# Supplementary material for: Treatment with glucagon‐like peptide‐1 receptor agonists and incidence of dementia: Data from pooled double‐blind randomized controlled trials and nationwide disease and prescription registers
Source: PubMed Central journal article supplement — Alzheimers Dement (N Y). 2022 Feb 23;8(1):e12268. doi: 10.1002/trc2.12268 (PMC8864443; doi:10.1002/trc2.12268), 2022-02-23
Supplement: TRC2-8-e12268-s001.pdf [file TRC2-8-e12268-s001.pdf]

## Supplementary Material

### Treatment with glucagon-like peptide-1 receptor agonists and incidence of dementia: data from pooled double-blind randomized controlled trials and nationwide disease and prescription registers

#### Contents

|                                                                                                                                                                                                                                                                                                 |    |
|-------------------------------------------------------------------------------------------------------------------------------------------------------------------------------------------------------------------------------------------------------------------------------------------------|----|
| Figure S1. Study design used in the nationwide cohort .....                                                                                                                                                                                                                                     | 2  |
| Figure S2. HRs for dementia with increase in exposure duration to GLP-1 receptor agonists and other second-line diabetes treatments in the nationwide cohort excluding the last 2 years prior to case date .....                                                                                | 3  |
| Figure S3. HRs for dementia with yearly increase in exposure duration to GLP-1 receptor agonists and other second-line diabetes treatments in the nationwide cohort, where diabetes duration was defined as “time since first treatment with metformin or second-line diabetes treatment” ..... | 4  |
| Figure S4. HRs for dementia with yearly increase in exposure duration to GLP-1 receptor agonists assessed 3, 5, and 10 years before diagnosis of dementia in the nationwide cohort .....                                                                                                        | 5  |
| Figure S5. HR for dementia with yearly increase in exposure duration to GLP-1 receptor agonist exposure in the nationwide cohort adjusted for age, sex, and calendar date via matching .....                                                                                                    | 6  |
| Figure S6. HR for competing risk of death with yearly increase in exposure duration to GLP-1 receptor agonist in the nationwide cohort .....                                                                                                                                                    | 7  |
| Figure S7. HRs for dementia with yearly increase in exposure duration to GLP-1 receptor agonists and other second-line diabetes treatments in the nationwide cohort (updated with 2018 register data) ...                                                                                       | 8  |
| Table S1. Data sources .....                                                                                                                                                                                                                                                                    | 10 |
| Table S2. Overview of definitions of diabetes treatments, dementia, and comorbidities for the nationwide cohort .....                                                                                                                                                                           | 11 |
| Table S3. Median follow-up and rates of dementia in each of the included RCTs .....                                                                                                                                                                                                             | 13 |
| Table S4. Dementia (Narrow Scope) SMQs search terms* applied in the post hoc analysis of the pooled RCTs .....                                                                                                                                                                                  | 14 |
| Table S5. Prespecified sensitivity analyses in the nationwide cohort .....                                                                                                                                                                                                                      | 15 |
| Table S6. HR for dementia in the pooled RCTs with specified dementia subtypes .....                                                                                                                                                                                                             | 16 |

**Figure S1. Study design used in the nationwide cohort**

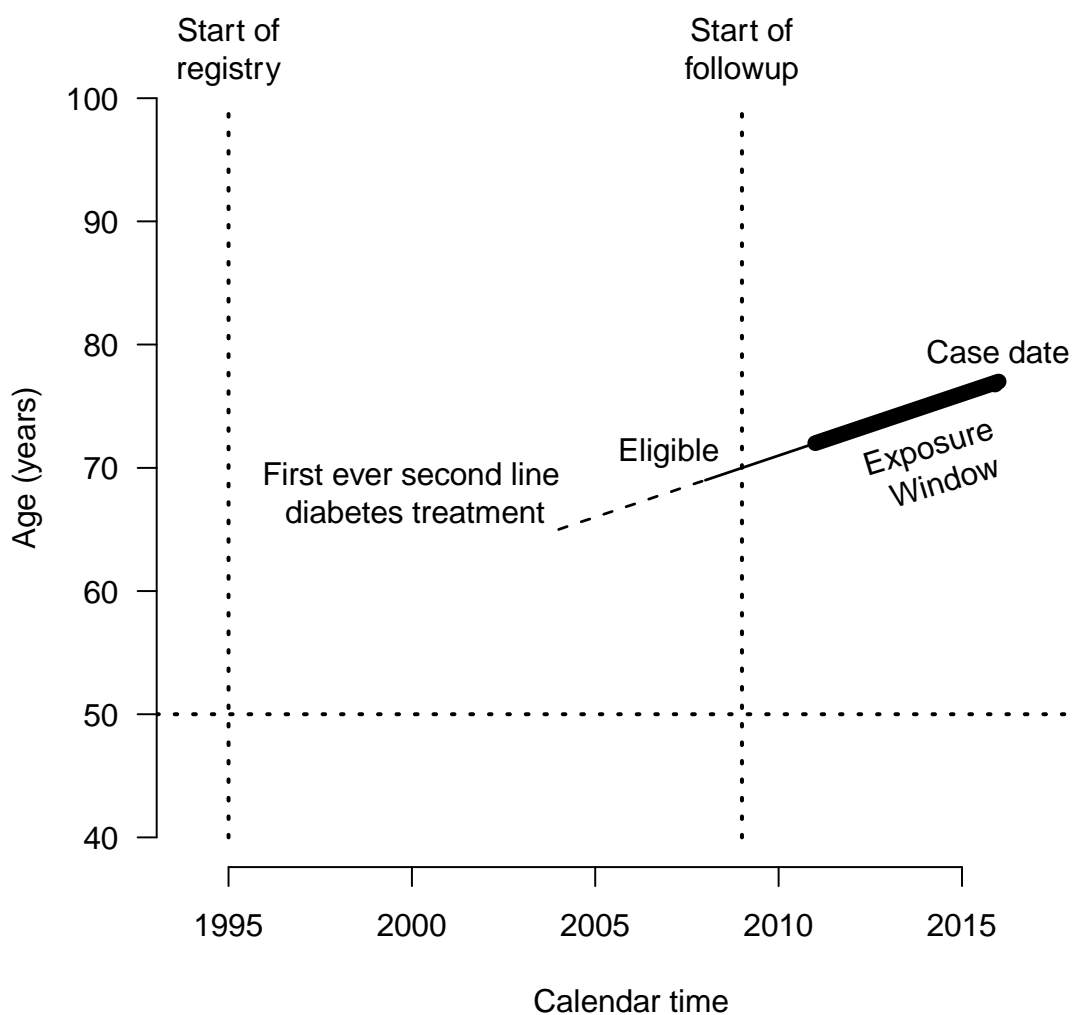

\*First ever second-line diabetes treatment = first treatment with diabetes treatment not including metformin; eligible = eligible for cohort of diabetes patients; case date = date of dementia diagnosis with matching of each case to ten controls without dementia; exposure window 5-year window prior to case date, where duration of cumulative diabetes treatment is assessed.

**Figure S2. HRs for dementia with increase in exposure duration to GLP-1RAs and other second-line diabetes treatments in the nationwide cohort excluding the last 2 years prior to case date**

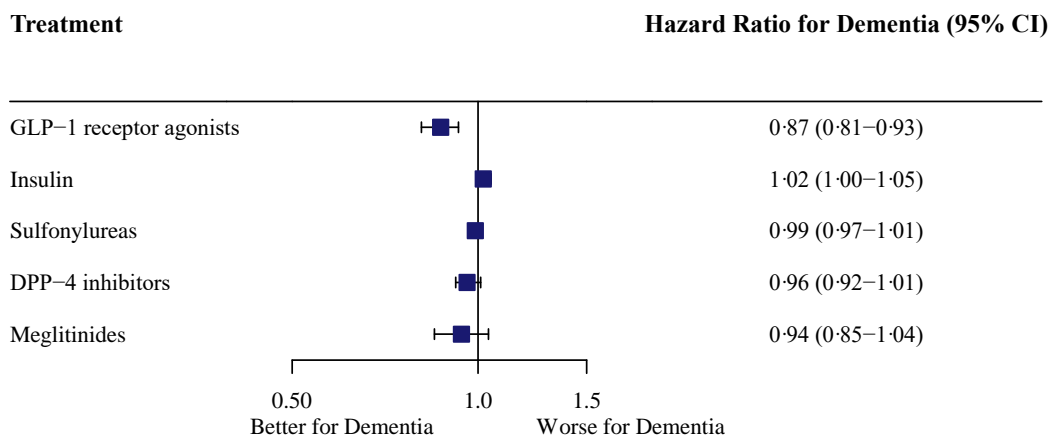

Cox proportional hazards regression models conducted for exposure to each treatment. Estimates denote the HR for a 1-year increase in duration of exposure. The models were adjusted for history of stroke, myocardial infarction, hypertension, educational attainment, and diabetes duration. Sex, age, and calendar date were included via matching. SGLT-2 inhibitors (HR: 0.98 (95% CI: 0.66–1.45)) were not available throughout the entire study period. CI, confidence interval; DPP-4, dipeptidyl peptidase-4; GLP-1RA, glucagon-like peptide-1 receptor agonist; HR, hazard ratio; SGLT-2, sodium-glucose co-transporter-2.

**Figure S3. HRs for dementia with yearly increase in exposure duration to GLP-1RAs and other second-line diabetes treatments in the nationwide cohort, where diabetes duration was defined as “time since first treatment with metformin or second-line diabetes treatment”**

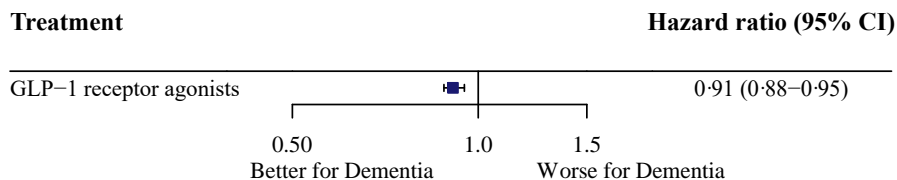

Cox proportional hazards regression models conducted for exposure to each treatment. Estimates denote the hazard ratio for a 1-year increase in duration of exposure. The models were adjusted for history of stroke, myocardial infarction, hypertension, educational attainment, and diabetes duration. Sex, age, and calendar date were included via matching. CI, confidence interval; GLP-1RA, glucagon-like peptide-1 receptor agonist.

**Figure S4. HRs for dementia with yearly increase in exposure duration to GLP-1RAs assessed 3, 5, and 10 years before diagnosis of dementia in the nationwide cohort**

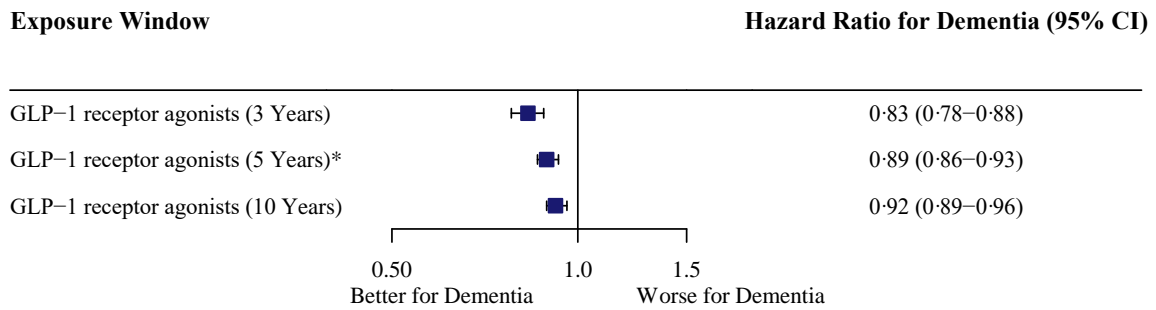

\*Primary analysis. Cox proportional hazards regression models conducted for GLP-1RA exposure and assessed during a 3, 5, and 10-year exposure window prior to dementia. Estimates denote the hazard ratio for a 1-year increase in duration of exposure. The models were adjusted for history of stroke, myocardial infarction, hypertension, educational attainment, and diabetes duration. Sex, age, and calendar date were included via matching. CI, confidence interval; GLP-1RA, glucagon-like peptide-1 receptor agonist.

**Figure S5. HR for dementia with yearly increase in exposure duration to GLP-1RA exposure in the nationwide cohort adjusted for age, sex, and calendar date via matching**

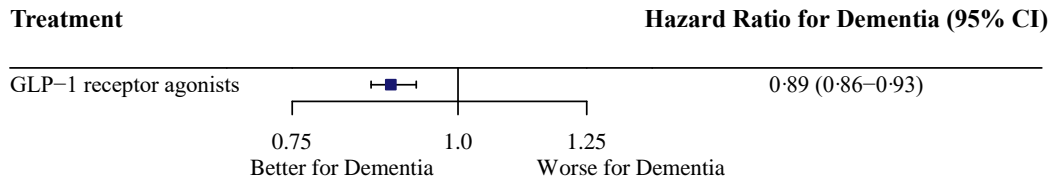

Cox proportional hazards regression model conducted for exposure to GLP-1 receptor agonists. The estimate denotes the hazard ratio for a 1-year increase in duration of exposure. The model was adjusted sex, age, and calendar date via matching. CI, confidence interval; GLP-1RA, glucagon-like peptide-1 receptor agonist.

**Figure S6. HR for competing risk of death with yearly increase in exposure duration to GLP-1RA in the nationwide cohort**

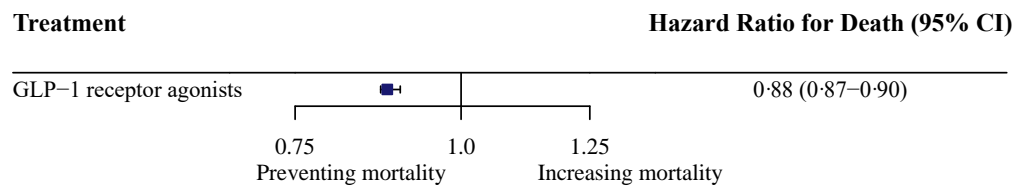

Cox proportional hazards regression model conducted for exposure to GLP-1 receptor agonists. The estimate denotes the hazard ratio for a 1-year increase in duration of exposure. The model was adjusted for history of stroke, myocardial infarction, hypertension, educational attainment, and diabetes duration. Sex, age, and calendar date were included via matching. CI, confidence interval; GLP-1RA, glucagon-like peptide-1 receptor agonist.

**Figure S7. HRs for dementia with yearly increase in exposure duration to GLP-1RAs and other second-line diabetes treatments in the nationwide cohort (updated with 2018 register data)**

**A) Main analysis**

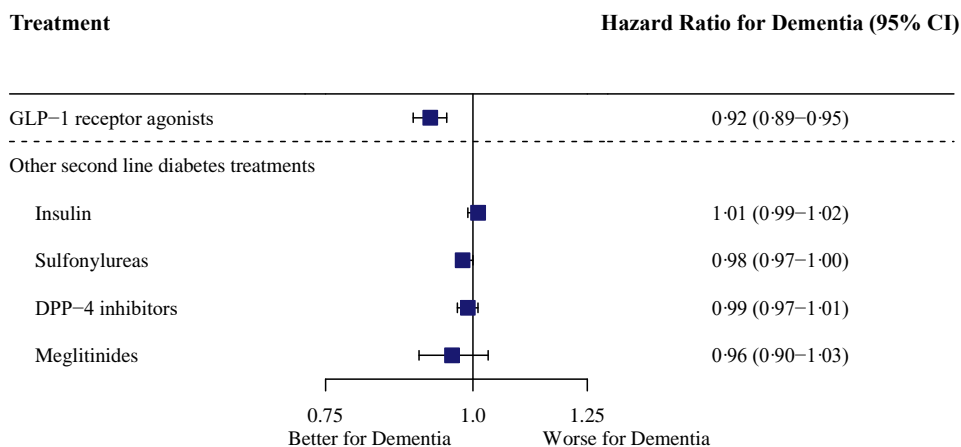

**B) Excluding the last 2 years prior to case date**

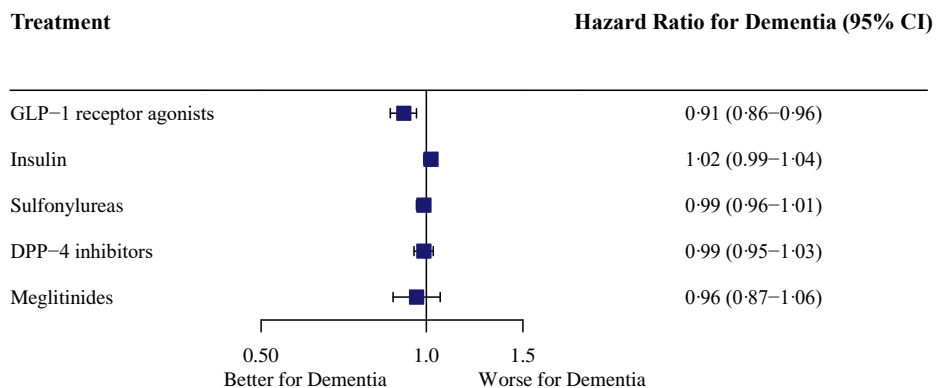

Cox proportional hazards regression models conducted for exposure to each treatment. Estimates denote the hazard ratio for a 1-year increase in duration of exposure. As the nationwide cohort draws from living database it became possible during the reporting phase to update the cohort with 2018 data. Results based on re-running the primary statistical model on these updated data was aligned with primary pre-specified results. The models were adjusted for history of stroke, myocardial infarction, hypertension, educational attainment, diabetes duration, and income level. Sex, age, and calendar date were included via matching. SGLT-2 inhibitors (A) main analysis: HR: 0.87; 95% CI:



0.78–0.96, B) Excluding the last 2 years prior to case date: HR: 0.83; 95% CI: 0.67–1.03) were not available throughout the entire study period. CI, confidence interval; DPP–4, dipeptidyl peptidase-4; GLP-1RA, glucagon-like peptide-1 receptor agonist; HR, hazard ratio; SGLT-2, sodium-glucose co-transporter-2.

**Table S1. Data sources**

| <b>Data source</b>       | <b>Registers/databases/<br/>Clinical trial information</b>                                                                            | <b>Variables</b>                                                                                  |
|--------------------------|---------------------------------------------------------------------------------------------------------------------------------------|---------------------------------------------------------------------------------------------------|
| <b>Pooled RCTs</b>       |                                                                                                                                       |                                                                                                   |
| LEADER                   | ClinicalTrials.gov number, NCT01179048.<br>Multicenter, double-blind, placebo-controlled trial conducted at 410 sites in 32 countries | Liraglutide vs. placebo                                                                           |
| SUSTAIN-6                | ClinicalTrials.gov number, NCT01720446.<br>Multicenter, double-blind, placebo-controlled trial conducted at 230 sites in 20 countries | Subcutaneous semaglutide vs. placebo                                                              |
| PIONEER 6                | ClinicalTrials.gov number, NCT02692716<br>Multicenter, double-blind, placebo-controlled trial conducted at 214 sites in 21 countries  | Oral semaglutide vs. placebo                                                                      |
| <b>Nationwide cohort</b> | The Danish National Patient Register                                                                                                  | Diagnosis of:<br>Dementia, hypertension, myocardial infarction, stroke, and chronic renal disease |
|                          | The Danish register of Medicinal Product Statistics                                                                                   | Treatment for:<br>Dementia, diabetes, and hypertension                                            |
|                          | Danish Register of Causes of Death                                                                                                    | Vital status, causes of death                                                                     |
|                          | Population Education Register                                                                                                         | Educational attainment                                                                            |

RCTs, randomized controlled trials.

**Table S2. Overview of definitions of diabetes treatments, dementia, and comorbidities for the nationwide cohort**

| <b>Condition/treatment</b>                          | <b>ATC codes and ICD codes</b>                                                                                        |
|-----------------------------------------------------|-----------------------------------------------------------------------------------------------------------------------|
| <b><i>Diabetes treatments</i></b> (ATC codes)       |                                                                                                                       |
| Metformin                                           | A10BA02                                                                                                               |
| <b><i>Second-line diabetes treatments</i></b>       |                                                                                                                       |
| GLP-1RAs                                            | A10BJ                                                                                                                 |
| <b><i>Other second-line diabetes treatments</i></b> |                                                                                                                       |
| Insulin                                             | A10A                                                                                                                  |
| Acarbose                                            | A10BF                                                                                                                 |
| DPP–4 inhibitors                                    | A10BH                                                                                                                 |
| Sulfonylureas                                       | A10BB                                                                                                                 |
| Meglitinides                                        | A10BX                                                                                                                 |
| TZD*                                                | A10BG                                                                                                                 |
| SGLT-2 inhibitors                                   | A10BK                                                                                                                 |
| <b><i>Dementia</i></b>                              |                                                                                                                       |
| (ATC codes)                                         |                                                                                                                       |
| Donepezil                                           | N06DA02                                                                                                               |
| Rivastigmine                                        | N06DA03                                                                                                               |
| Galantamine                                         | N06DA04                                                                                                               |
| Memantine                                           | N06DX01                                                                                                               |
| (ICD codes)                                         | DF00, DG30, DF01, DF023, DF028, DF03                                                                                  |
| <b><i>Comorbidities</i></b>                         |                                                                                                                       |
| (ICD codes)                                         |                                                                                                                       |
| Hypertension                                        | ICD-10: DI10-DI13, DI15<br>ATC: C02-C03, C07, C09                                                                     |
| Myocardial infarction                               | ICD-8: 410<br>ICD-10: DI21, DI22                                                                                      |
| Stroke                                              | ICD-8: 433-438<br>ICD-10: DI63, DI64, DG458, DG459                                                                    |
| Chronic renal disease                               | ICD-8: 25002, 40039, 59009, 59320, 75310-75311, 75319<br>ICD-10: DN158-DN159, DQ612-DQ613, DQ615, DG619, DE102, DE112 |

DE132, DE142, DI120, DN160, DN162-DN164, DN168, DM300, DM313,  
DM319, DM321B

---

\*These products were not available at the same calendar period as GLP-1 receptor agonists and thus were not considered alternative treatment options to GLP-1 receptor agonists.

ATC, Anatomical Therapeutic Chemical; ICD, International Classification of Diseases; GLP-1RA, glucagon-like peptide-1 receptor agonist; DPP-4, dipeptidyl peptidase-4; SGLT-2, sodium-glucose co-transporter-2; TZD, thiazolidinedione.

**Table S3. Median follow-up and rates of dementia in each of the included RCTs**

|                                  | N    | Treatment groups               | Median follow-up duration | Dementia SMQ GLP-1RAs |      | Dementia SMQ Placebo |      |
|----------------------------------|------|--------------------------------|---------------------------|-----------------------|------|----------------------|------|
|                                  |      |                                |                           | No. of events         | Rate | No. of events        | Rate |
| <b>LEADER*</b><br>EX2211-3748    | 9340 | Liraglutide vs. placebo        | 3.8 years                 | 12                    | 0.67 | 25                   | 1.41 |
| <b>SUSTAIN-6†</b><br>NN9535-3744 | 3297 | Semaglutide (s.c) vs. placebo  | 2.1 years                 | 3                     | 0.88 | 5                    | 1.47 |
| <b>PIONEER 6‡</b><br>NN9924-4221 | 3183 | Semaglutide (oral) vs. placebo | 1.3 years                 | 0                     |      | 2                    | 0.96 |

\*In LEADER, the minimum planned follow-up was 42 months, with a maximum of 60 months of receiving the assigned regimen and subsequently 30 days of follow-up.

†In SUSTAIN-6, the planned observation period was 109 weeks, consisting of 104 weeks of the assigned regimen and subsequently 5 weeks of follow-up.

‡In PIONEER 6, no predefined minimum treatment duration was required, but follow-up was required to continue until 122 events of the primary outcome had occurred.

\*†‡In all three trials, the treatment for diabetes (excluding GLP-1 receptor agonists, dipeptidyl peptidase-4 inhibitors (DPP-4 inhibitors), and pramlintide) was adjusted or added in both arms, at the investigator's discretion.

GLP-1RA, glucagon-like peptide-1 receptor agonist; RCTs, randomized controlled trials; SMQ, Short-Memory Questionnaire.

**Table S4. Dementia (Narrow Scope) SMQs search terms\* applied in the post hoc analysis of the pooled RCTs**

| <b>Name</b>                                           | <b>Scope</b> |
|-------------------------------------------------------|--------------|
| Clinical dementia rating scale score abnormal         | Narrow       |
| Corticobasal degeneration                             | Narrow       |
| Creutzfeldt-Jakob disease                             | Narrow       |
| Dementia                                              | Narrow       |
| Dementia Alzheimer's type                             | Narrow       |
| Dementia of the Alzheimer's type, uncomplicated       | Narrow       |
| Dementia of the Alzheimer's type, with delirium       | Narrow       |
| Dementia of the Alzheimer's type, with delusions      | Narrow       |
| Dementia of the Alzheimer's type, with depressed mood | Narrow       |
| Dementia with Lewy bodies                             | Narrow       |
| Early onset familial Alzheimer's disease              | Narrow       |
| Frontotemporal dementia                               | Narrow       |
| Hippocampal sclerosis                                 | Narrow       |
| Korsakoff's syndrome                                  | Narrow       |
| Mini mental status examination abnormal               | Narrow       |
| Mixed dementia                                        | Narrow       |
| Presenile dementia                                    | Narrow       |
| Prion disease                                         | Narrow       |
| Progressive supranuclear palsy                        | Narrow       |
| Scatolia                                              | Narrow       |
| Senile dementia                                       | Narrow       |
| Variant Creutzfeldt-Jakob disease                     | Narrow       |
| Vascular dementia                                     | Narrow       |

\*Version 21.1.

RCTs, randomized controlled trials; SMQs, Standardized MedDRA Queries.

**Table S5. Prespecified sensitivity analyses in the nationwide cohort**

---

**Sensitivity analyses**

---

- 1) Exposure two years before the case date was ignored
  - 2) Diabetes duration defined as “time since first treatment with metformin or second-line diabetes treatment
  - 3) Shortening and lengthening the exposure windows (3- and 10-year, respectively)
  - 4) Adjustment only via matching on age, sex, and calendar date
  - 5) Competing risk of death
-

**Table S6. HR for dementia in the pooled RCTs with specified dementia subtypes**

| <b>Diagnoses</b>          | <b>GLP-1RA</b><br>No. of patients | <b>Placebo</b><br>No. of patients | <b>HR for dementia</b><br><b>(95% CI)</b> |
|---------------------------|-----------------------------------|-----------------------------------|-------------------------------------------|
| Dementia                  | 6                                 | 15                                |                                           |
| Dementia Alzheimer's type | 5                                 | 7                                 |                                           |
| Dementia with Lewy bodies | 0                                 | 2                                 |                                           |
| Mixed dementia            | 2                                 | 2                                 |                                           |
| Senile dementia           | 1                                 | 3                                 |                                           |
| Vascular dementia         | 1                                 | 3                                 |                                           |
| Total                     | 15 (0.19%)                        | 32 (0.40%)                        | 0.47 (0.25–0.86)                          |

CI, confidence interval; GLP-1RA, glucagon-like peptide-1 receptor agonist; RCTs, randomized controlled trials.
